# Supplementary material for: Coordination polymers constructed by 1,3-bi(4-pyridyl)propane with four different conformations and 2,2′-dinitro-4,4′-biphenyldicarboxylate ligands: the effects of metal ions
Source: Royal Society of Chemistry journal article supplement (doi:10.1039/c0ce00252f), 2010-10-29
Supplement: c0ce00252f.pdf [file c0ce00252f.pdf]

# **Electronic Supplementary Information (ESI) for:**

## **Coordination Polymers Constructed by 1, 3-Bi(4-pyridyl)propane with Four Different Configurations and 2,2'-Dinitro-4,4'-biphenyldicarboxylate Ligands: The Effects of Metal Ions**

**Baiyan Li, Guanghua Li, Dan Liu, Yu Peng, Xiaojing Zhou, Jia Hua, Zhan Shi\* and  
Shouhua Feng**

State Key Laboratory of Inorganic Synthesis and Preparative Chemistry, College of

Chemistry, Jilin University, Changchun, 130012, People's Republic of China

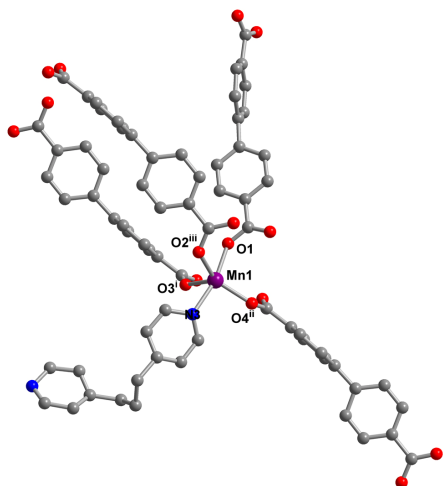

**Fig. S1** Coordination sphere of Mn atom in crystal **1** (Nitro groups of NBPDC, hydrogen atoms and disordered atoms have been omitted for clarity) Symmetry codes: (i)  $x+1/2, -y+1/2, z+1/2$ ; (ii)  $-x+3/2, y-1/2, -z+3/2$ ; (iii)  $-x+2, y, -z+3/2$ .

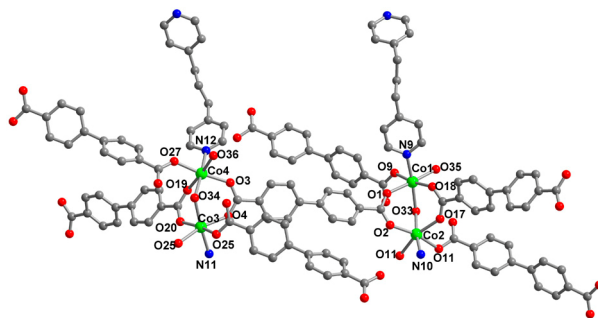

**Fig. S2** Coordination spheres of Co atoms in crystal **2** (Nitro groups of NBPDC and hydrogen atoms have been omitted for clarity).

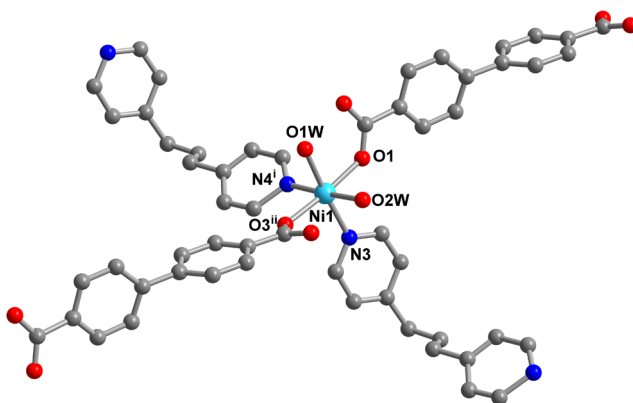

**Fig. S3** Coordination sphere of Ni atom in crystal **3** (Nitro groups of NBPDC, hydrogen atoms and disordered atoms have been omitted for clarity) Symmetry codes: (i)  $x, y+1, z$ ; (ii)  $x-1, y, z+1$ .

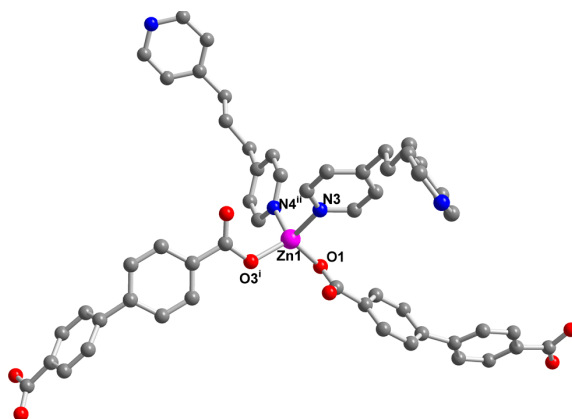

**Fig. S4** Coordination sphere of Zn atom in crystal **4** (Nitro groups of NBPDC and hydrogen atoms have been omitted for clarity)  
Symmetry codes: (i)  $x-3/2, -y+3/2, z-1/2$ ; (ii)  $x-1, -y+1, z+1/2$ .

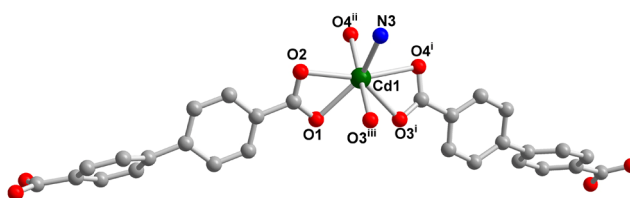

**Fig. S5** Coordination sphere of Ni atom in crystal **5** (Nitro groups of NBPDC and hydrogen atoms have been omitted for clarity)  
Symmetry codes: (i)  $x+1/2, -y+1/2, z+1/2$ ; (ii)  $-x+1/2, -y+1/2, -z+1$ ; (iii)  $-x+1/2, y-1/2, -z+1/2$ .

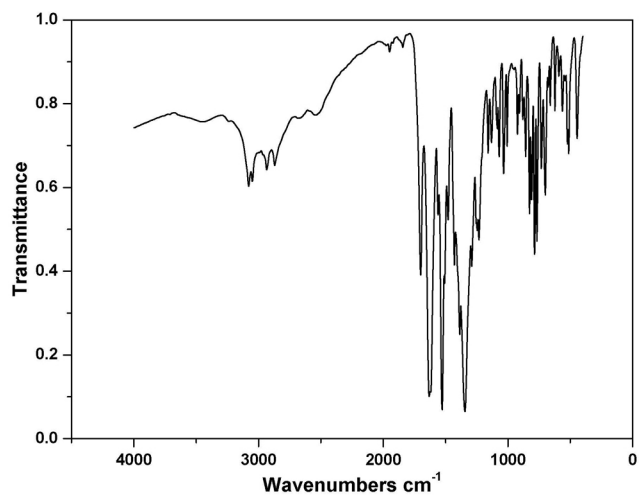

**Fig. S6** IR figure of compound **1**.

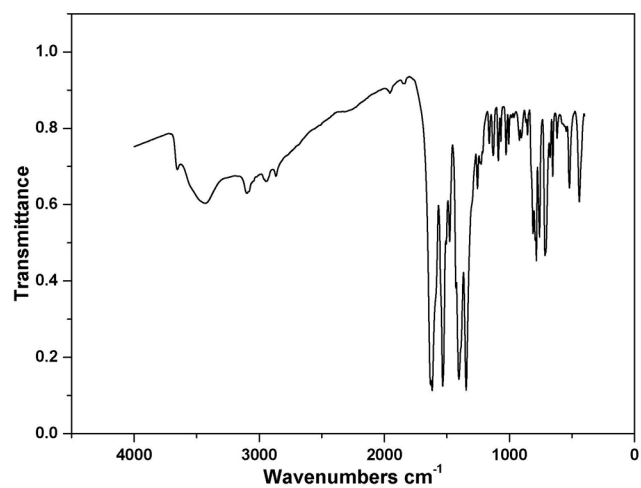

Fig. S7 IR figure of compound 2.

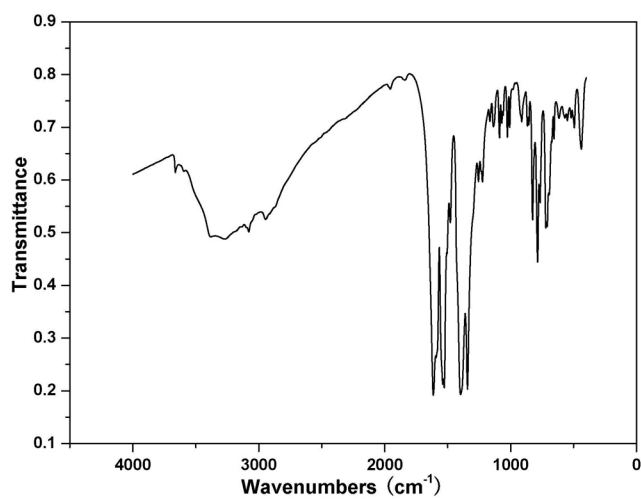

Fig. S8 IR figure of compound 3.

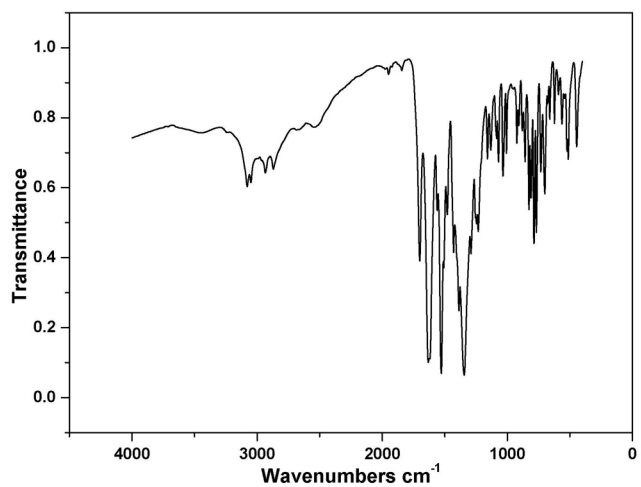

Fig. S9 IR figure of compound 4.

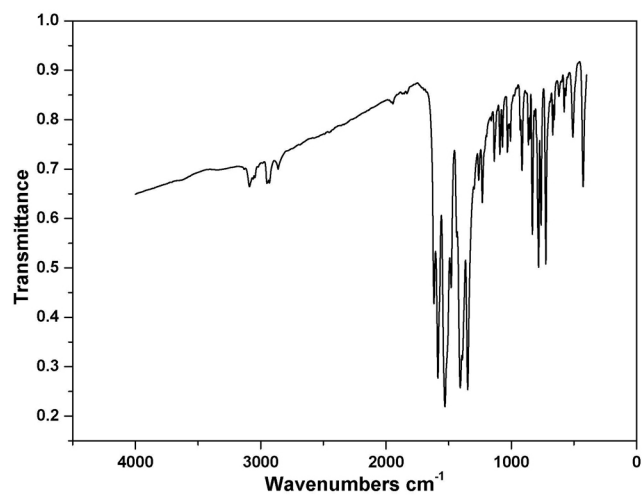

Fig. S10 IR figure of compound 5

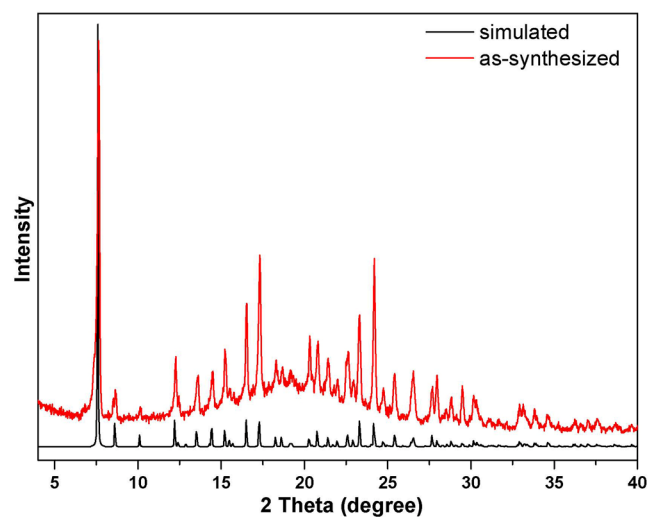

Fig. S11 XRD figure of compound 1.

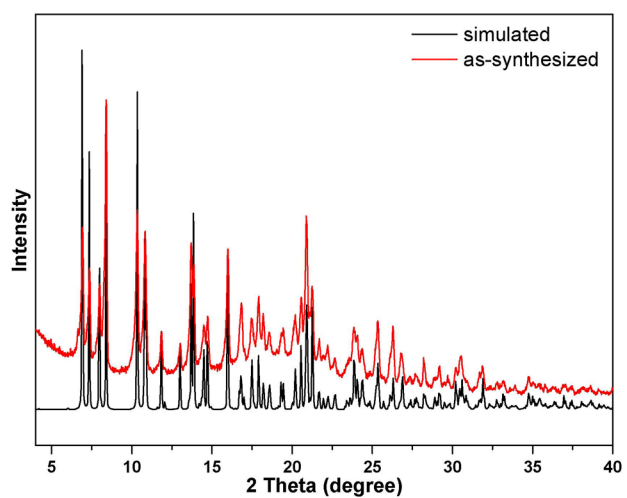

Fig. S12 XRD figure of compound 2.

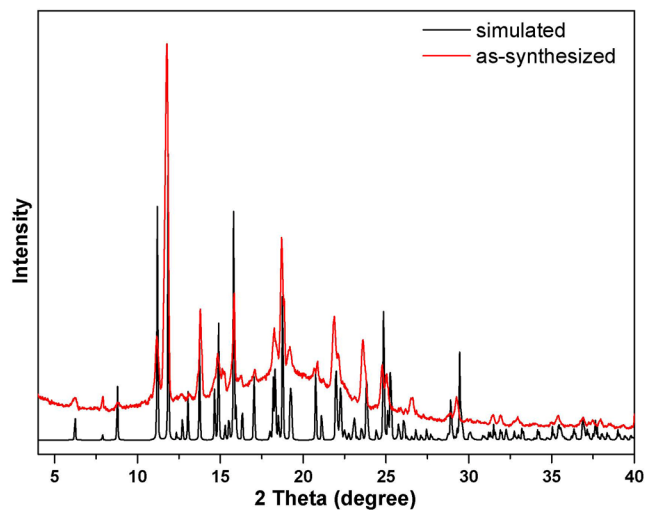

Fig. S13 XRD figure of compound 3.

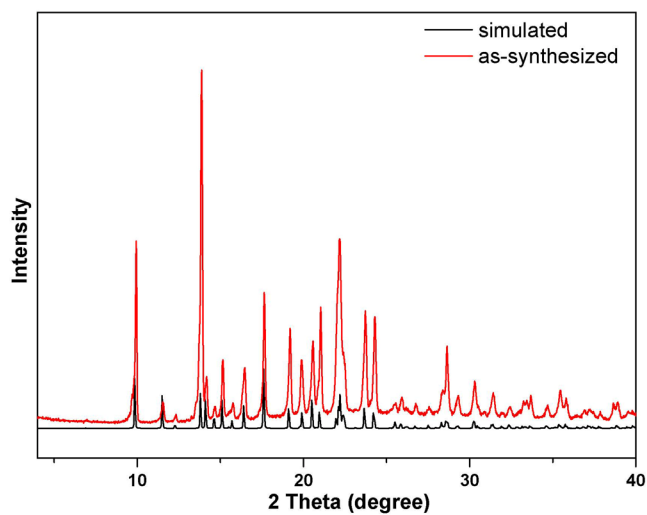

Fig. S14 XRD figure of compound 4.

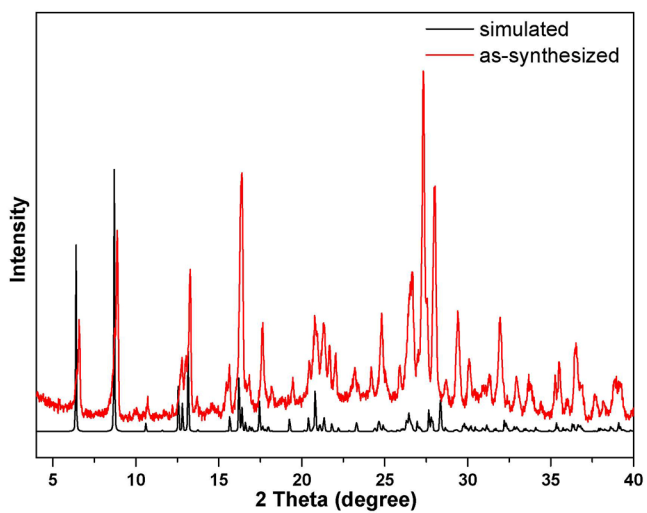

Fig. S15 XRD figure of compound 5.

### Thermal stability

To investigate the thermal stability of compound 1-5, TG study were performed on TGA Q500 V20.10 Build 36 under N<sub>2</sub> condition with a heating rate of 10°C/min from room temperature to 800 °C. As shown in Figure S16, thermal decomposition temperatures of five compounds are approximately 320 °C for **1**, 290 °C for **2**, 330 °C for **3**, 370 °C for **4**, and 350 °C for **5**, respectively.

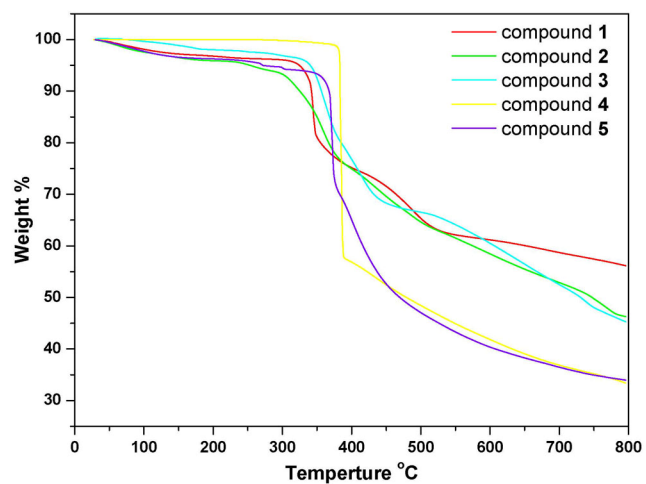

Fig. S16 TG figure of compound 1-5.
